# Supplementary material for: Caveolin 1 Promotes Renal Water and Salt Reabsorption
Source: PubMed Central journal article supplement (PMC5765123; doi:10.1038/s41598-017-19071-6), 2018-01-11
Supplement: 41598_2017_19071_MOESM1_ESM.pdf [file 41598_2017_19071_MOESM1_ESM.pdf]

# Caveolin 1 Promotes Renal Water and Salt Reabsorption

**Yan Willière<sup>1,§</sup>, Aljona Borschewski<sup>1,§</sup>, Andreas Patzak<sup>2</sup>,  
Tatiana Nikitina<sup>2</sup>, Carsten Dittmayer<sup>1</sup>, Anna L. Daigeler<sup>1</sup>,  
Markus Schuelke<sup>3</sup>, Sebastian Bachmann<sup>1</sup>, and Kerim  
Mutig<sup>1,\*</sup>**

<sup>1</sup>Department of Anatomy, Charité-Universitätsmedizin Berlin,  
Berlin, Germany;

<sup>2</sup>Department of Physiology, Charité-Universitätsmedizin  
Berlin, Berlin, Germany

<sup>3</sup>Department of Neuropediatrics, Charité-  
Universitätsmedizin Berlin, Berlin, Germany

\* kerim.mutig@charite.de

§ These authors have contributed to the study equally.

# Original immunoblot scans

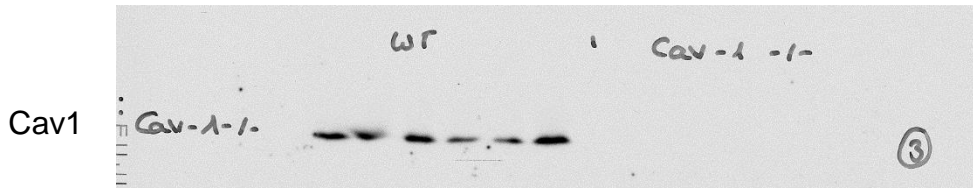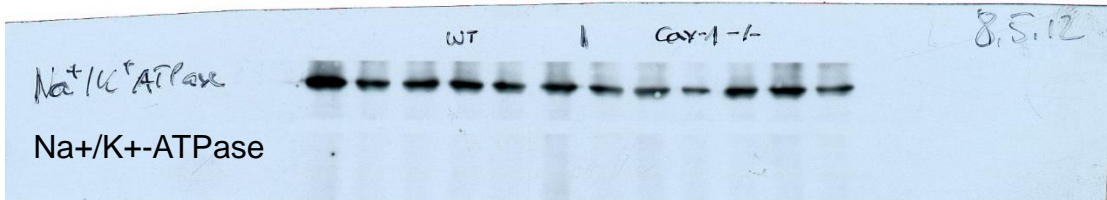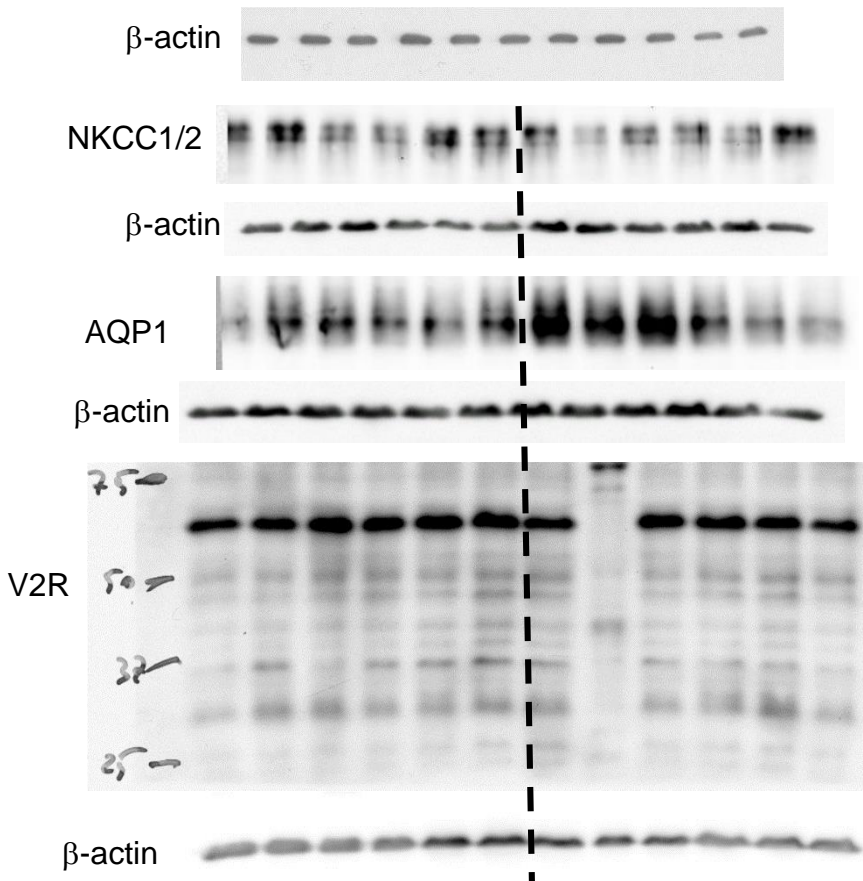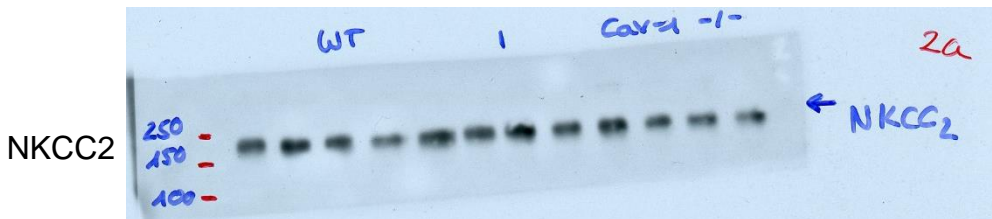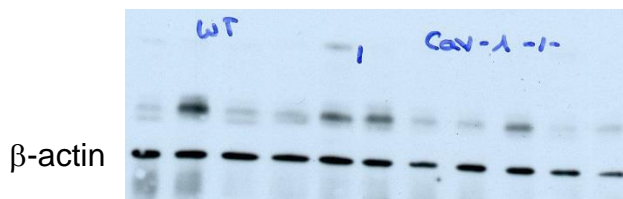

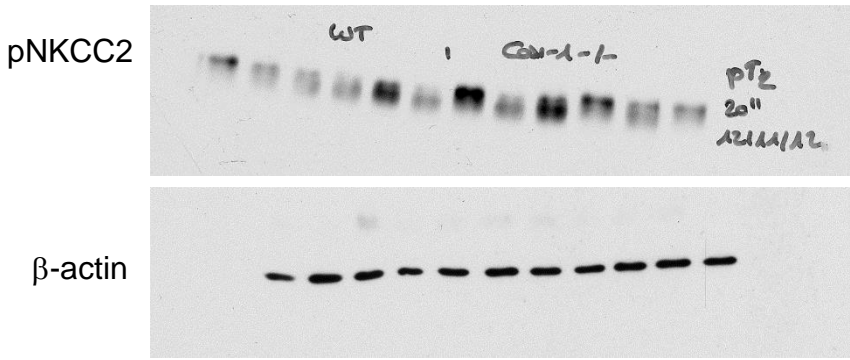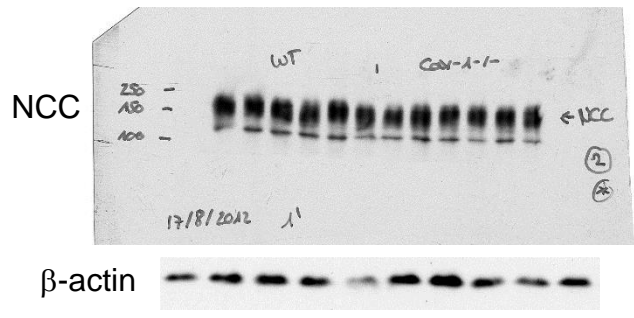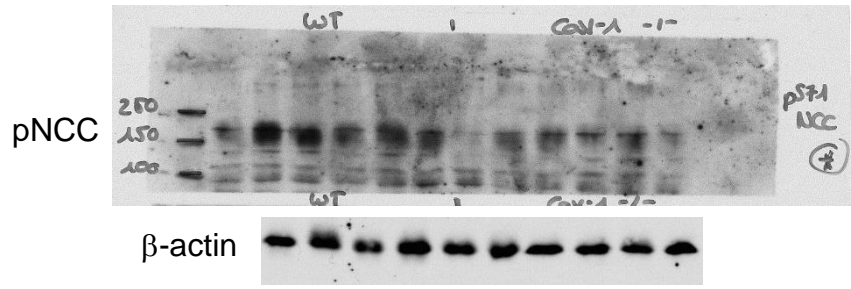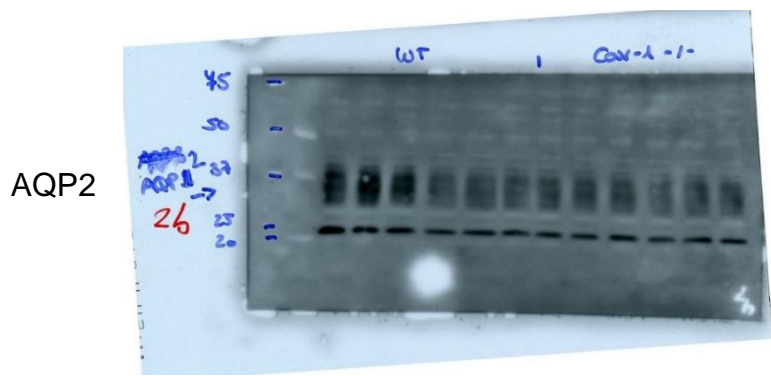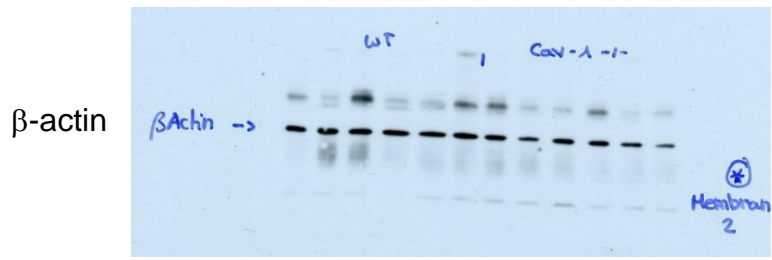

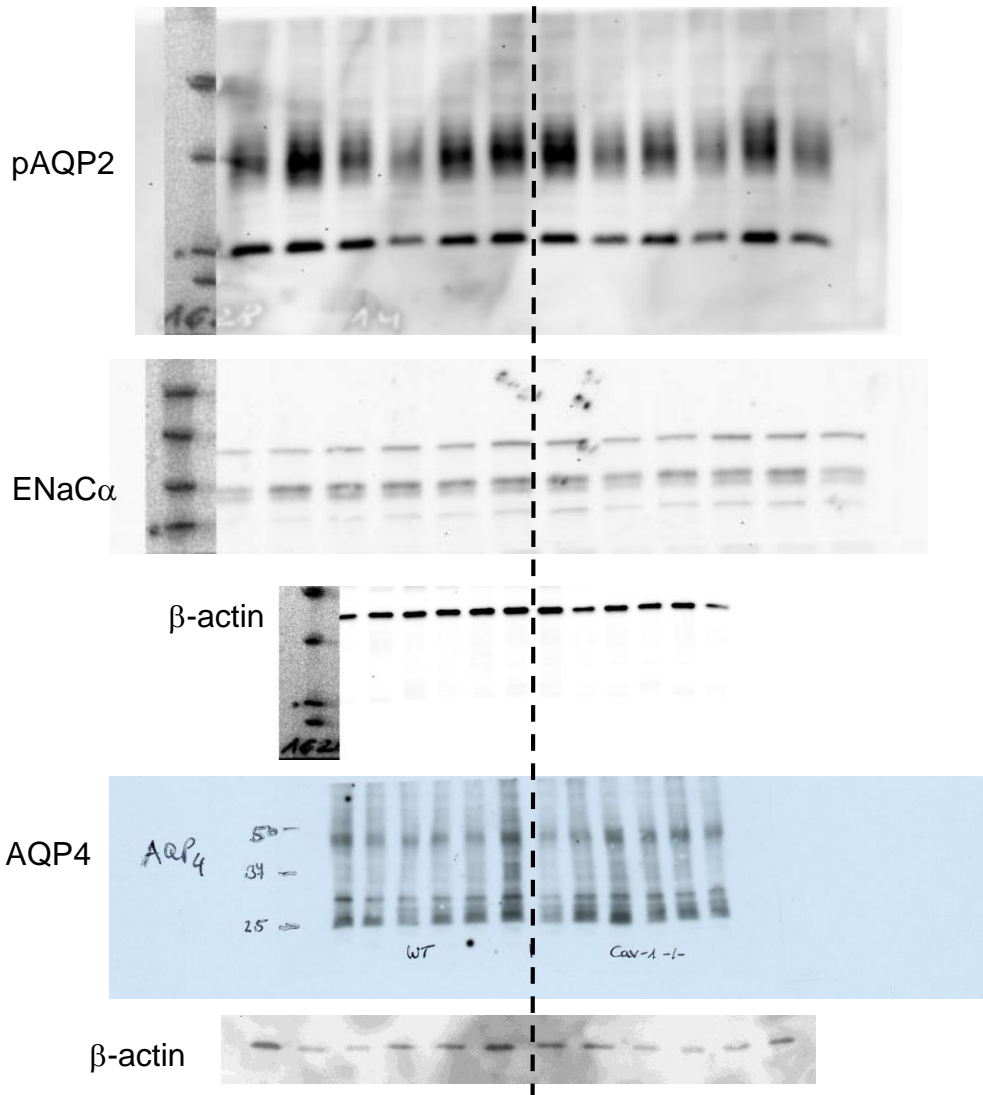

**Original immunoblot scans** for Cav1, alpha subunit of Na/K-ATPase (Na<sup>+</sup>/K<sup>+</sup>), NKCC1/2 (antibody recognizes both NKCC isoforms), AQP1, V2R, NKCC2, phosphorylated (p) NKCC2 (pT96/T101-NKCC2), NCC, pNCC (pS71-NCC), AQP2, pAQP2 (pS256-AQP2), alpha subunit of epithelial sodium channel (ENaC $\alpha$ ) and aquaporin 4 (AQP4); pAQP2 and ENaC $\alpha$  were detected on the same membrane cut according to their molecular sizes and therefore share the same loading control; loading controls via  $\beta$ -actin detection are shown below the corresponding immunoblots.
